# Supplementary material for: People With Aneurysmal Subarachnoid Hemorrhage Have Low Physical Fitness and Can Be Predisposed to Inactive and Sedentary Lifestyles
Source: PubMed Central journal article supplement — Phys Ther. 2019 Mar 27;99(7):904–14. doi: 10.1093/ptj/pzz046 (PMC7207355; doi:10.1093/ptj/pzz046), 2019-03-27
Supplement: pzz046_supplement_file.pdf [file pzz046_supplement_file.pdf]

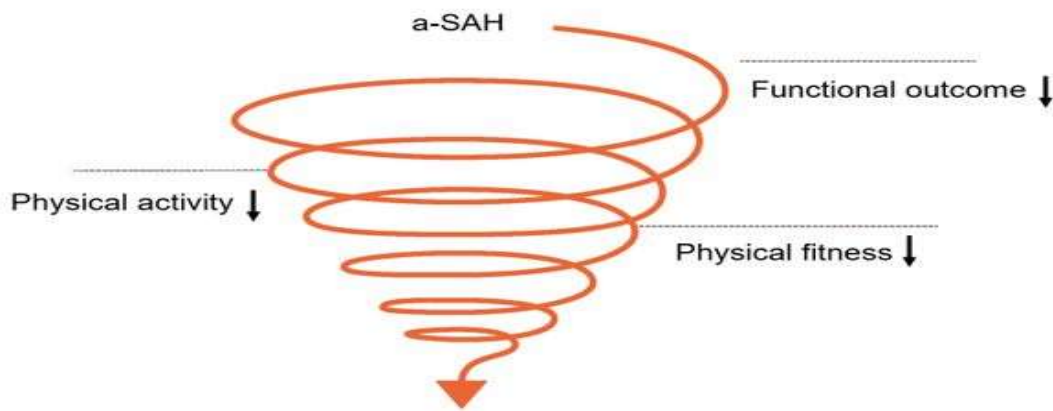

**Supplementary Figure 1.** Negative circle of physical deconditioning. Disease can lead to impaired functional outcome and low physical activity, with subsequent low physical fitness. In turn, physical deconditioning can lead to further inactivity and increase the potential for disability. a-SAH: aneurysmal subarachnoid haemorrhage.

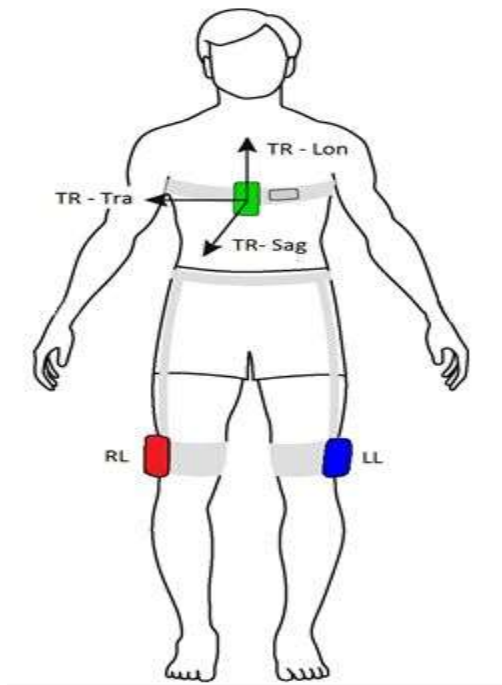

**Supplementary Figure 2.** Placement of the VitaMove activity monitor. Abbreviations: TR= Trunk sensor; RL= Right leg sensor; LL= Left leg sensor; Lon= longitudinal axis; Sag= sagittal axis; Tra= transversal axis.
